# Supplementary material for: 18F-Fluorothymidine PET-CT for Resected Malignant Gliomas before Radiotherapy: Tumor Extent according to Proliferative Activity Compared with MRI
Source: PubMed Central journal article supplement (PMC4349865; doi:10.1371/journal.pone.0118769), 2015-03-04
Supplement: pone.0118769.s001.pdf [file pone.0118769.s001.pdf]

**Table\_S1.** Patient characteristics and results of volumetric measurements of T1 and T2-weighted MRI vs. FLT-PET in 19 patients with resected malignant gliomas.

| Patient No | Gender | Age | WHO grade | Vol-T1 | Vol-PET | Vol-T2 | Vol-(T1 minus PET) | Intersection Vol-T1/PET | Vol-(PET Minus T1) | Vol-(T2 minus PET) | Intersection Vol-T2/PET | Vol-(PET minus T2) |
|------------|--------|-----|-----------|--------|---------|--------|--------------------|-------------------------|--------------------|--------------------|-------------------------|--------------------|
| 1          | F      | 38  | III       | 7.5    | 4.7     | 25.6   | 2.8                | 4.7                     | 0                  | 20.9               | 4.7                     | 0                  |
| 2          | M      | 54  | IV        | 2.2    | 2.2     | 8.5    | 0                  | 2.2                     | 0                  | 6.3                | 2.2                     | 0                  |
| 3          | M      | 63  | IV        | 20.8   | 20.8    | 36.9   | 0                  | 20.8                    | 0                  | 16.1               | 20.8                    | 0                  |
| 4          | M      | 40  | III       | 68.2   | 15.5    | 98.7   | 52.7               | 15.5                    | 0                  | 83.2               | 15.5                    | 0                  |
| 5          | F      | 47  | IV        | 7.8    | 59.4    | 106    | 0                  | 7.8                     | 51.6               | 57.6               | 48.4                    | 11                 |
| 6          | M      | 52  | IV        | 12.4   | 32.9    | 28.8   | 7.2                | 5.2                     | 27.7               | 13.4               | 15.4                    | 17.5               |
| 7          | M      | 36  | III       | 3.5    | 8.8     | 14.7   | 1.4                | 2.1                     | 6.7                | 6.1                | 8.6                     | 0                  |
| 8          | M      | 56  | IV        | 1.9    | 4.3     | 9.5    | 0.9                | 1                       | 3.3                | 5.2                | 4.3                     | 0                  |
| 9          | F      | 58  | IV        | 1.7    | 1.8     | 3.9    | 1.2                | 0.5                     | 1.3                | 2.1                | 1.8                     | 0                  |
| 10         | M      | 20  | IV        | 2.9    | 3.6     | 3.3    | 1.1                | 1.8                     | 1.8                | 0.8                | 2.5                     | 1.1                |
| 11         | M      | 43  | III       | 4.2    | 7.8     | 15.3   | 1.9                | 2.3                     | 5.5                | 7.5                | 7.8                     | 0                  |
| 12         | M      | 64  | IV        | 6.4    | 6.9     | 9.9    | 0.6                | 5.8                     | 1.1                | 4                  | 5.9                     | 1                  |
| 13         | M      | 76  | IV        | 14.3   | 22.9    | 44.8   | 2.3                | 12                      | 10.9               | 26.8               | 18                      | 4.9                |
| 14         | F      | 49  | IV        | 3.2    | 4.8     | 31.4   | 1.2                | 2                       | 2.8                | 26.6               | 4.8                     | 0                  |
| 15         | M      | 55  | III       | 22.8   | 28.5    | 69.6   | 8.8                | 14                      | 14.5               | 51.3               | 18.3                    | 10.2               |
| 16         | F      | 56  | IV        | 10.48  | 6.2     | 5.4    | 4.28               | 6.2                     | 0                  | 3.5                | 1.9                     | 4.3                |
| 17         | F      | 51  | IV        | 4.8    | 3.3     | 10.4   | 2.9                | 1.9                     | 1.4                | 8.1                | 2.3                     | 0                  |
| 18         | M      | 65  | III       | 10.4   | 9.8     | 29.8   | 8                  | 2.4                     | 7.4                | 20                 | 9.8                     | 0                  |
| 19         | M      | 50  | III       | 42.9   | 33.5    | 72.6   | 19.8               | 23.1                    | 10.4               | 54.3               | 18.3                    | 15.2               |
